## Scientific Statements

*A scientific statement is an official ADA point of view or belief that may or may not contain clinical or research recommendations. Scientific statements contain scholarly synopsis of a topic related to diabetes. Work group reports fall into this category. Scientific statements are published in the ADA journals and other scientific/medical publications, as appropriate. Scientific statements also undergo a formal review process. Listed below are recent scientific statements.*

### **Economic Costs of Diabetes in the U.S. in 2012**

American Diabetes Association  
*Diabetes Care* 36:1033–1046, 2013

### **Hypoglycemia and Diabetes: A Report of a Workgroup of the American Diabetes Association and The Endocrine Society**

Elizabeth R. Seaquist, John Anderson, Belinda Childs, Philip Cryer, Samuel Dagogo-Jack, Lisa Fish, Simon R. Heller, Henry Rodriguez,

James Rosenzweig, and Robert Vigersky  
*Diabetes Care* 36:1384–1395, 2013

### **Scientific Statement: Socioecological Determinants of Prediabetes and Type 2 Diabetes**

James O. Hill, James M. Galloway, April Goley, David G. Marrero, Regan Minners, Brenda Montgomery, Gregory E. Peterson, Robert E. Ratner, Eduardo Sanchez, and Vanita R. Aroda  
*Diabetes Care* 36:2430–2439, 2013

### **Nonnutritive Sweeteners: Current Use and Health Perspectives. A Scientific Statement From the American Heart Association and the American Diabetes Association**

Christopher Gardner, Judith Wylie-Rosett, Samuel S. Gidding, Lyn M. Steffen, Rachel K. Johnson, Diane Reader, and Alice H. Lichtenstein, on behalf of the American Heart Association Nutrition Committee of the Council on Nutrition, Physical Activity and Metabolism, Council on Arteriosclerosis, Thrombosis and

Vascular Biology, Council on Cardiovascular Disease in the Young, and the American Diabetes Association  
*Diabetes Care* 35:1798–1808, 2012

### **Comprehensive Foot Examination and Risk Assessment: A Report of the Task Force of the Foot Care Interest Group of the American Diabetes Association, With Endorsement by the American Association of Clinical Endocrinologists**

Andrew J.M. Boulton, David G. Armstrong, Stephen F. Albert, Robert G. Frykberg, Richard Hellman, M. Sue Kirkman, Lawrence A. Lavery, Joseph W. LeMaster, Joseph L. Mills, Sr., Michael J. Mueller, Peter Sheehan, and Dane K. Wukich  
*Diabetes Care* 31:1679–1685, 2008

### **American Diabetes Association Statement on Emergency and Disaster Preparedness: A Report of the Disaster Response Task Force**

The Disaster Response Task Force  
*Diabetes Care* 30:2395–2398, 2007
